# Supplementary material
Source: PubMed Central journal article supplement (PMC3754728)
Supplement: AEM.01197-13_zam999104585so1.pdf [file AEM.01197-13_zam999104585so1.pdf]

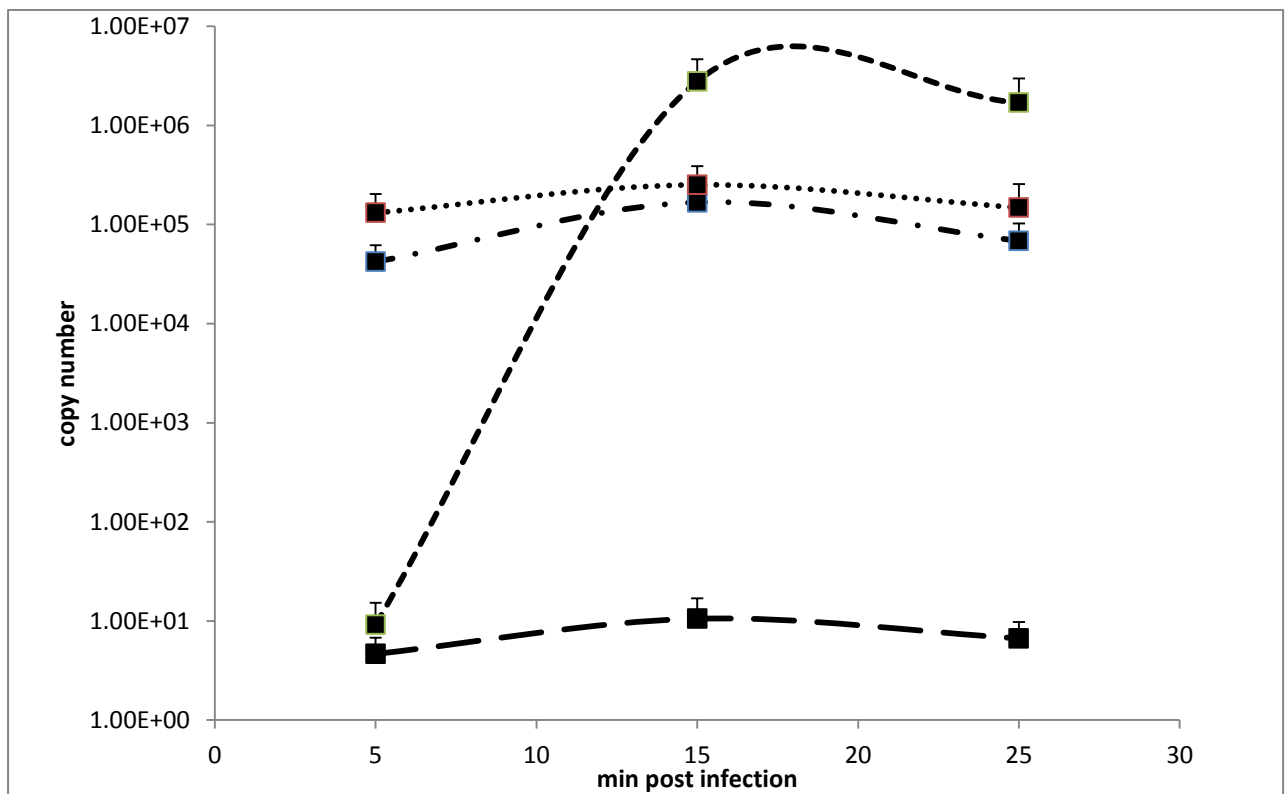

Figure S1. qPCR determination *L. lactis* UC509.9 chromosome integrity during Tuc2009 infection. Total DNA was extracted at regular time points post infection and the quantity of *L. lactis* UC509.9 reporter gene *alaS* (dotted line represents infected UC509.9 and dotted-dashed line represents uninfected UC509.9) and Tuc2009 reporter gene *orf56* (dashed line represents infected UC509.9, double dashed line represents uninfected UC509.9) was determined from three independent reactions.
